# Supplementary material for: Single-atom cobalt-fused biomolecule-derived nitrogen-doped carbon nanosheets for selective oxidation reactions
Source: Royal Society of Chemistry journal article supplement (doi:10.1039/d1cp01113h), 2021-01-01
Supplement: d1cp01113h1.pdf [file d1cp01113h1.pdf]

# Single-atomic cobalt fused biomolecule-derived nitrogen-doped carbon nanosheets for selective oxidation reaction

Miao Xia, Haitao Huang, Xuefei Zhang, Qiao-Hua Wei and Zilai Xie\*

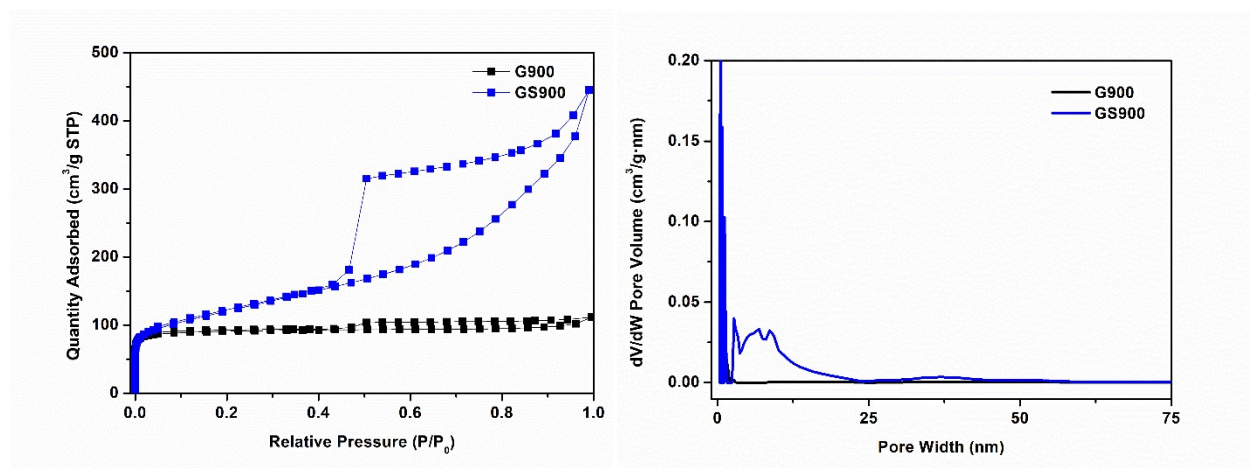

Fig. S1. The N<sub>2</sub> isotherm and pore distribution of carbons G900 and GS900.

| sample       | $S_{\text{total}}(\text{m}^2\text{g}^{-1})$ | Pore volume ( $\text{cm}^3\text{g}^{-1}$ ) |                    |                   |
|--------------|---------------------------------------------|--------------------------------------------|--------------------|-------------------|
|              |                                             | $V_{\text{total}}$                         | $V_{\text{micro}}$ | $V_{\text{meso}}$ |
| <b>G900</b>  | 278.42                                      | 0.15                                       | 0.12               | 0.02              |
| <b>GS900</b> | 419.54                                      | 0.46                                       | 0.07               | 0.37              |

$S_{\text{total}}$ : total BET specific surface area;  $V_{\text{total}}$ : total pore volume;  $V_{\text{micro}}$ : micropore volume;

$V_{\text{meso}}$ : mesopore volume.

and GS900.

Table S1.  
The porosity data of carbon catalysts G900

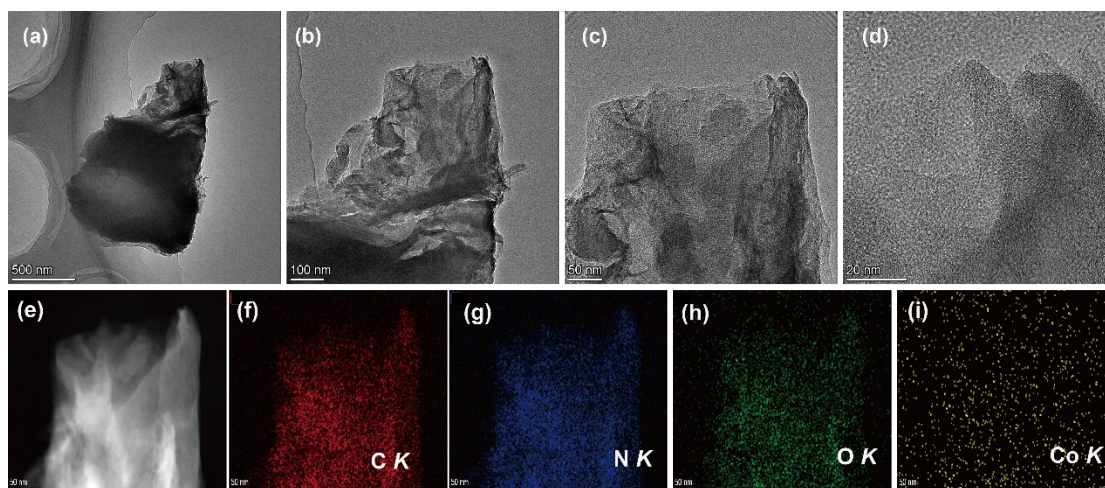

Fig S2 **Microstructure and morphology characterizations of Co-G-900 catalysts.**  
**a-d** TEM images **e** HADDF-STEM image **f-i** EDS elemental mapping.

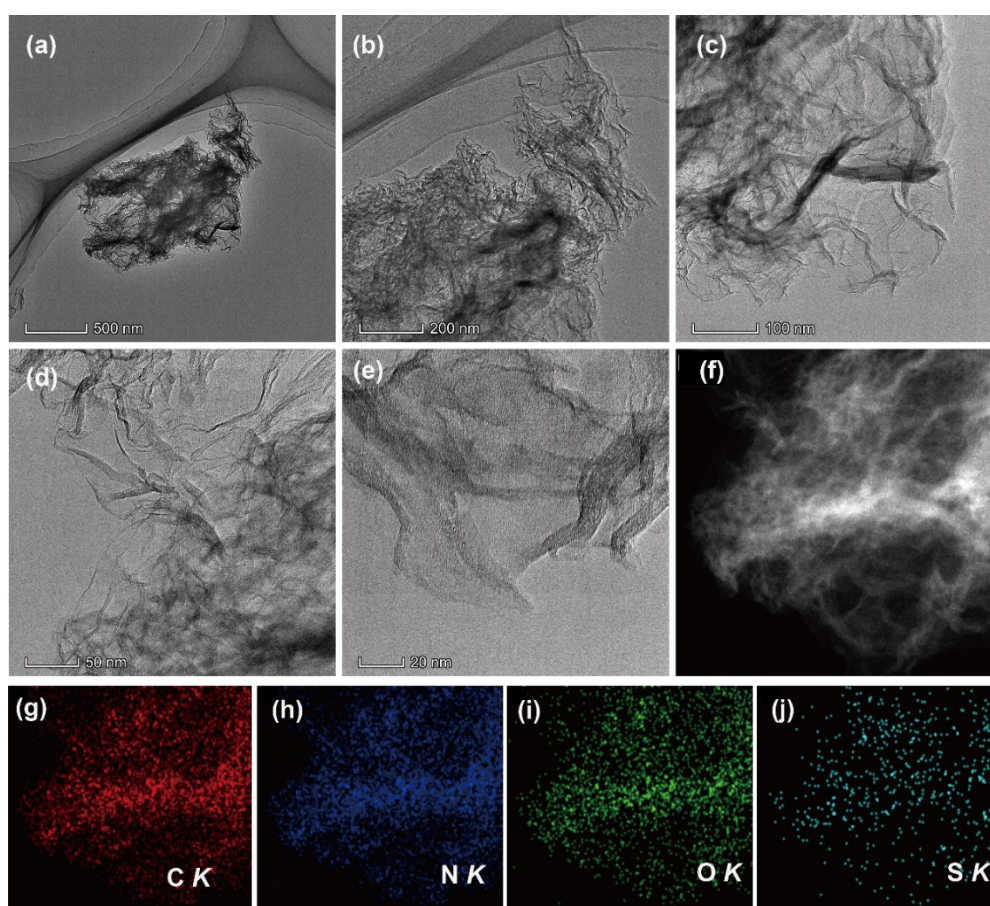

Fig S3 **Microstructure and morphology characterizations of GS-900 catalysts.** **a-e** TEM images **f** HADDF-STEM image **g-j** EDS elemental mapping.



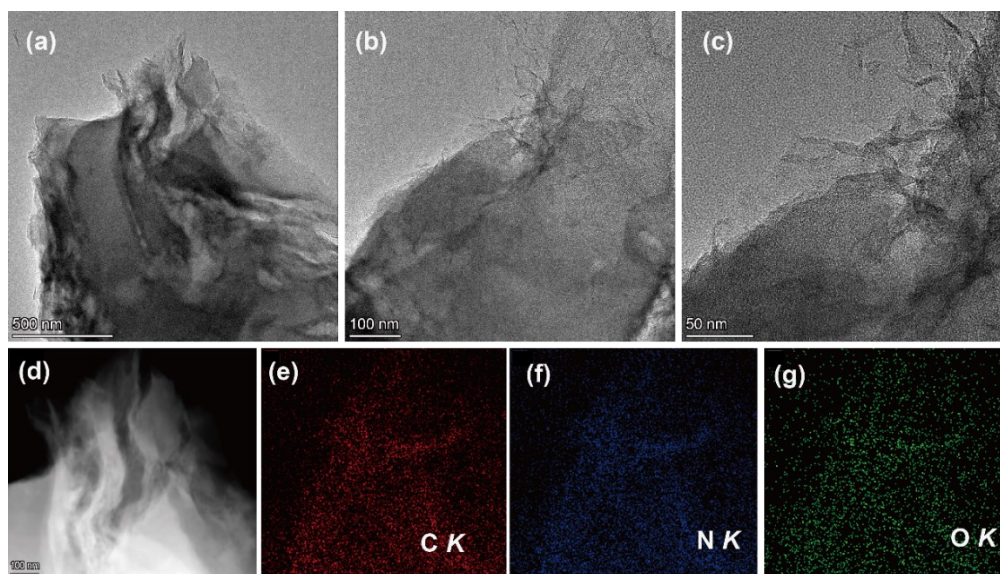

Fig S4 **Microstructure and morphology characterizations of G-900 catalysts.** a-c TEM images d HADDF-STEM image e-g EDS elemental mapping.

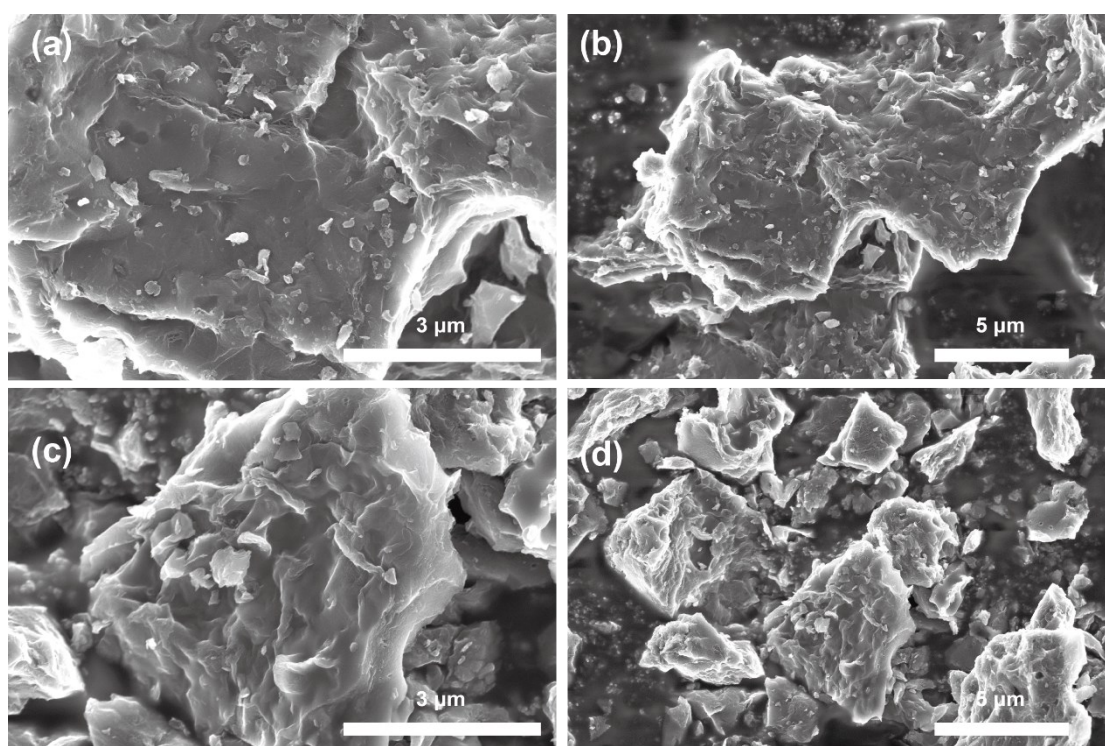

Fig S5 **a-b** The SEM images of Co-G-900 **c-d** The SEM images of G900
